# Supplementary material for: Prognostic value of protein inhibitor of activated STAT3 in breast cancer patients receiving hormone therapy
Source: PubMed Central journal article supplement (PMC4714466; doi:10.1186/s12885-016-2063-1), 2016-01-14

A

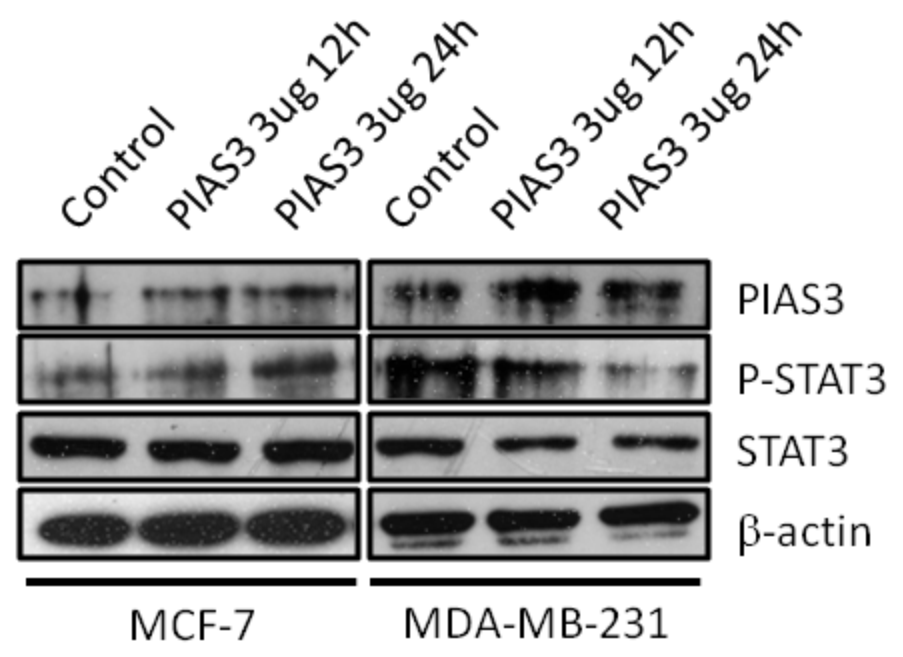

B

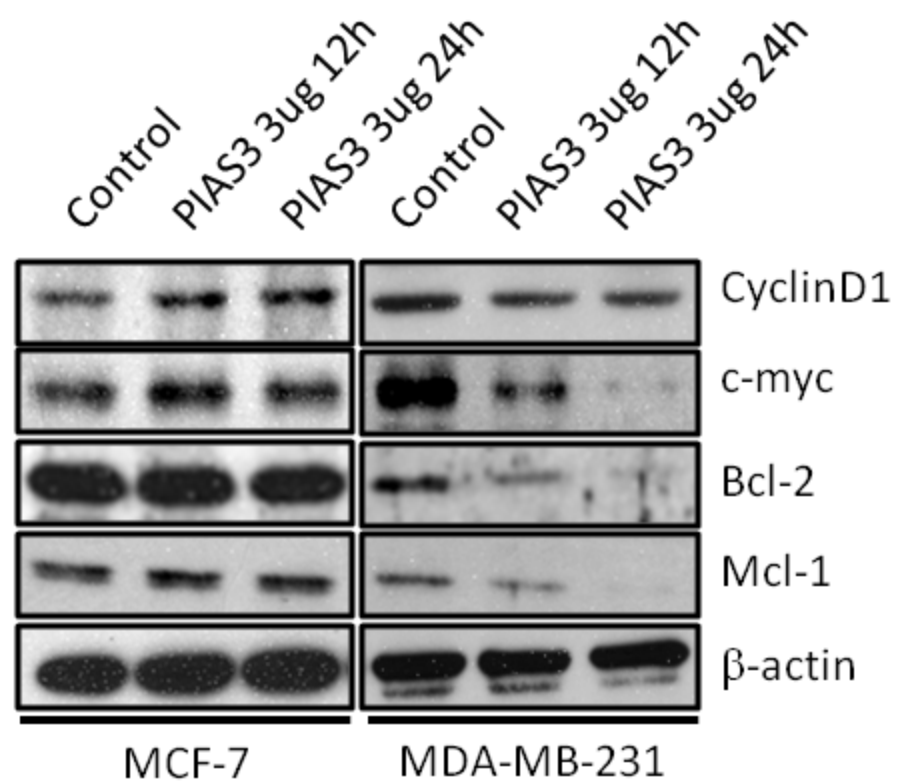

Supplement: 12885_2016_2063_MOESM2_ESM.pdf [file 12885_2016_2063_MOESM2_ESM.pdf]
